# Supplementary material for: Light mediated the interface interaction of commercial graphene oxide in natural surface water: photo-transformation, microbial diversity and metabolism
Source: Royal Society of Chemistry journal article supplement (doi:10.1039/d3en00591g), 2023-01-01
Supplement: d3en00591g1.pdf [file d3en00591g1.pdf]

Electronic supplementary information for

**Light-mediated the interface interaction of commercial graphene oxide in natural surface water: Photo-transform, microbial diversity, and metabolism**

Yang Gao, <sup>a</sup> Li Chen, <sup>a</sup> Peihuan Wen, <sup>a</sup> Letao Zhou, <sup>a</sup> Shaohu Ouyang, <sup>b, \*</sup> Wenjing Xue, <sup>c</sup> Wei Zhang, <sup>a</sup> Lean Zhou, <sup>a</sup> Jinting Wang, <sup>a</sup> and Shiquan Sun <sup>a</sup>

<sup>a</sup> *School of Hydraulic and Environmental Engineering, Changsha University of Science and Technology, Changsha 410114, China*

<sup>b</sup> *College of Environmental Science and Engineering, Nankai University, Tianjin 300350, China*

<sup>c</sup> *College of Environmental Science and Engineering, Yangzhou University, Yangzhou, 225009, China*

\*Corresponding author: Shaohu Ouyang (ouyangshaohu@nankai.edu.cn).

**The ESI contains 39 pages with 19 Figures and 11 Tables.**

## List of Supplemental Figures

|                                                                                                                                                                                                                     |     |
|---------------------------------------------------------------------------------------------------------------------------------------------------------------------------------------------------------------------|-----|
| <b>Figure S1.</b> The zeta potential (A) and hydrodynamic diameter (B) of CGO in XJW without/with UV exposure as a function of time (CGO: 20 mg/L). .....                                                           | S12 |
| <b>Figure S2.</b> TEM images of CGO +XJW (CGO: 20 mg/L). .....                                                                                                                                                      | S12 |
| <b>Figure S3.</b> Comparison of Sobs index during the three groups. ....                                                                                                                                            | S13 |
| <b>Figure S4.</b> The $\alpha$ diversity comparison of the three groups at the species level. Shannon index (A), Simpson index (B), Shannon evenness (C), and Simpson evenness (D). S13                             | S13 |
| <b>Figure S5.</b> PCoA plots of Bray–Curtis distances at the genus (A) and species (B) levels. ....                                                                                                                 | S14 |
| <b>Figure S6.</b> Relative abundance of the major bacteria species among different groups. ....                                                                                                                     | S14 |
| <b>Figure S7.</b> The microbial community heatmap analysis on species level. ....                                                                                                                                   | S15 |
| <b>Figure S8.</b> The cyclic voltammetry curves of different aqueous solution systems. (A) XJW, (B) XJW+UV, (C) XJW+GO and (D) XJW+GO+UV.....                                                                       | S15 |
| <b>Figure S9.</b> The first-order derivative of the cyclic voltammetry curves of different aqueous solution systems. (A) XJW, (B) XJW+UV, (C) XJW+GO and (D) XJW+GO+UV. ....                                        | S16 |
| <b>Figure S10.</b> Integration of polar metabolites and transcript revealed toxicity induced by CGO. The PCA score plot of metabolites (A) pos, (B) neg; The PLS-DA score plot of metabolites (C) pos, (D) neg..... | S16 |
| <b>Figure S11.</b> The volcanic map of differential metabolites (pos+neg) of (A) GO2-XJW48, (B) GO5-XJW48, (C) UV-XJW48, and (D) GOUV-XJW48. (The red and blue                                                      |     |

dots were considered to indicate significantly upregulated and downregulated metabolites, respectively. Metabolites shown in gray dots were not significantly changed or those were not measured.).....S17

**Figure S12.** The volcanic map of differential metabolites (pos+neg) of (A) XJW48-XJW0, (B) GO5-GO2, (C) GOUV-GO, and (D) GOUV-UV. (The red and blue dots were considered to indicate significantly upregulated and downregulated metabolites, respectively. Metabolites shown in gray dots were not significantly changed or those were not measured.).....S18

**Figure S13.** Significantly disturbed metabolic pathways in (A) GO2-XJW48; (B) GO5-XJW48; (C) UV-XJW48; (D) GOUV-XJW48; (E) GOUV-GO; (F) GOUV-UV. ....S19

**Figure S14.** The microbial metabolism pathways of GO2-XJW48 were constructed based on the iPath 3 pathway database. Metabolites with an arresting red color are highlighted based on the comparisons of the treatment groups with the control.....S20

**Figure S15.** The microbial metabolism pathways of GO5-XJW48 were constructed based on the iPath 3 pathway database. Metabolites with an arresting red color are highlighted based on the comparisons of the treatment groups with the control.....S20

**Figure S16.** The microbial metabolism pathways of UV-XJW48 were constructed based on the iPath 3 pathway database. Metabolites with an arresting red color are highlighted based on the comparisons of the treatment groups with the control.....S21

**Figure S17.** The microbial metabolism pathways of GOUV-XJW48 were constructed based on the iPath 3 pathway database. Metabolites with an arresting red color are highlighted based on the comparisons of the treatment groups with the control.....S21

**Figure S18.** The microbial metabolism pathways of GO5-GO2 were constructed based on the iPath 3 pathway database. Metabolites with an arresting red color are highlighted based on the comparisons of the treatment groups with the control.....S22

**Figure S19.** The microbial metabolism pathways of GOUV-GO2 were constructed based on the iPath 3 pathway database. Metabolites with arresting red color are highlighted based on the comparisons of the treatment groups with the control.....S22

## List of Supplemental Tables

|                                                                                                                                                                                                                                                                                                                                                     |    |
|-----------------------------------------------------------------------------------------------------------------------------------------------------------------------------------------------------------------------------------------------------------------------------------------------------------------------------------------------------|----|
| <b>Table S1.</b> Technical data of the commercial GO purchased from TIMESNANO <sup>a</sup> .....                                                                                                                                                                                                                                                    | 23 |
| <b>Table S2.</b> Physicochemical properties of the XJW. ....                                                                                                                                                                                                                                                                                        | 23 |
| <b>Table S3.</b> The Raman peak analysis of D-bond and G-bond by Gaussian.....                                                                                                                                                                                                                                                                      | 23 |
| <b>Table S4.</b> XPS data of the C 1s and O 1s of the CGO, CGO+XJW, and CGO+XJW+UV.<br>.....                                                                                                                                                                                                                                                        | 24 |
| <b>Table S5.</b> The relative abundance (%) of major bacterial phyla and genera in Sediment (SM), Supernatant (SN), and Blank (BL). ....                                                                                                                                                                                                            | 25 |
| <b>Table S6.</b> The comparison of the relative abundance (%) of major bacterial phyla and genera among Sediment (SM), Supernatant (SN), and Blank (BL).....                                                                                                                                                                                        | 26 |
| <b>Table S7.</b> The statistical table of differential metabolism in different groups. A fold change (FC) > 1.2 and $p < 0.05$ or fold change < 0.83 and $p < 0.05$ were considered to indicate significantly upregulated and downregulated metabolites, respectively.....                                                                          | 26 |
| <b>Table S8.</b> The variable importance in the projection (VIP), Fold change (FC), <i>p-value</i> , and false discovery rate (FDR) value in metabolites abundance of GO2-XJW48. The $FC > 1.2$ and $p < 0.05$ or $FC < 0.83$ and $p < 0.05$ were considered to indicate significantly upregulated and downregulated metabolites, respectively..... | 27 |
| <b>Table S9.</b> The variable importance in the projection (VIP), Fold change (FC), <i>p-value</i> , and false discovery rate (FDR) value in metabolites abundance of GO5-XJW48. The $FC > 1.2$ and $p < 0.05$ or $FC < 0.83$ and $p < 0.05$ were considered to indicate significantly upregulated and downregulated metabolites, respectively..... | 29 |
| <b>Table S10.</b> The variable importance in the projection (VIP), Fold change (FC), <i>p-value</i> ,                                                                                                                                                                                                                                               |    |

and false discovery rate (FDR) value in metabolites abundance of UV-XJW48. The FC  $> 1.2$  and  $p < 0.05$  or  $FC < 0.83$  and  $p < 0.05$  were considered to indicate significantly upregulated and downregulated metabolites, respectively.....32

**Table S11.** The variable importance in the projection (VIP), Fold change (FC), *p-value*, and false discovery rate (FDR) value in metabolites abundance of GOUV-XJW48. The FC  $> 1.2$  and  $p < 0.05$  or  $FC < 0.83$  and  $p < 0.05$  were considered to indicate significantly upregulated and downregulated metabolites, respectively.....35

### **Natural surface waters**

The natural surface water (depth, 0.5 m) was collected from Xiangjiang River (◆ (112.97, 28.15), Hunan province, China) by organic glass hydrophore and collected in polyethylene containers. Xiangjiang River is the longest river of the Hunan province (Span: 948 km, Total basin area: 94721 km<sup>2</sup>). The Xiangjiang River basin is the most densely populated area with the highest urbanization level and the most developed economy, society, and culture in Hunan Province. Before use, all the instruments and vessels used in the sampling were cleaned and treated with 10% nitric acid solution and Milli Q water (UPR-II-10TNZ, China) (18.2 MΩ · cm). The natural surface water samples were stored around the ice bags (kept in the dark) during sampling and delivery and then immediately transported to the laboratory for further analysis.

### **Metabolite extraction**

500 mg solid samples were accurately weighed, and the metabolites were extracted using a 400 μL methanol: water (4:1, v/v) solution with 0.02 mg/mL L-2-chlorophenylalanin as internal standard. The mixture was allowed to settle at -10 °C and treated by High throughput tissue crusher Wonbio-96c (Shanghai Wanbo Biotechnology Co., LTD) at 50 Hz for 6 min, then followed by ultrasound at 40 kHz for 30 min at 5 °C. The samples were placed at -20 °C for 30 min to precipitate proteins. After centrifugation at 13000 g at 4 °C for 15 min, the supernatant was carefully transferred to sample vials for LC-MS/MS analysis.

### **UHPLC-MS/MS analysis**

The instrument platform for this LC-MS analysis is the UHPLC-Q Exactive HF-X

system of Thermo Fisher Scientific. 2  $\mu$ L of sample was separated by HSS T3 column (100 mm  $\times$  2.1 mm i.d., 1.8  $\mu$ m) and then entered into mass spectrometry detection. The mobile phases consisted of 0.1% formic acid in water: Acetonitrile (95:5, v/v) (solvent A) and 0.1% formic acid in acetonitrile: Isopropanol: water (47.5:47.5:5, v/v) (solvent B). The solvent gradient changed according to the following conditions: from 0 to 3.5 min, 0% B to 24.5% B (0.4 mL/min); from 3.5 to 5 min, 24.5% B to 65% B (0.4 mL/min); from 5 to 5.5 min, 65% B to 100% B (0.4 mL/min); from 5.5 to 7.4 min, 100% B to 100% B (0.4 mL/min to 0.6 mL/min); from 7.4 to 7.6 min, 100% B to 51.5% B (0.6 mL/min); from 7.6 to 7.8 min, 51.5% B to 0% B (0.6 mL/min to 0.5 mL/min); from 7.8 to 9 min, 0% B to 0% B (0.5 mL/min to 0.4 mL/min); from 9 to 10 min, 0% B to 0% B (0.4 mL/min) for equilibrating the systems. The sample injection volume was 2  $\mu$ L and the flow rate was set to 0.4 mL/min. The column temperature was maintained at 40  $^{\circ}$ C. During the period of analysis, all these samples were stored at 4  $^{\circ}$ C.

The mass spectrometric data was collected using a Thermo UHPLC -Q Exactive HF-X Mass Spectrometer equipped with an electrospray ionization (ESI) source operating in either positive or negative ion mode. The optimal conditions were set as follows: heater temperature, 425  $^{\circ}$ C; Capillary temperature, 325  $^{\circ}$ C; sheath gas flow rate, 50 arb; Aux gas flow rate, 13 arb; ion-spray voltage floating (ISVF), -3500V in negative mode and 3500V in positive mode, respectively; Normalized collision energy, 20-40-60V rolling for MS/MS. Full MS resolution was 60000, and MS/MS resolution was 7500. Data acquisition was performed with the Data Dependent Acquisition (DDA) mode.



The detection was carried out over a mass range of 70-1050 m/z.

### **Data preprocessing and annotation**

After the mass spectrometry detection is completed, the raw data of LC/MS is preprocessed by Progenesis QI (Waters Corporation, Milford, USA) software, and a three-dimensional data matrix in CSV format is exported. The information in this three-dimensional matrix includes: sample information, metabolite name, and mass spectral response intensity. Internal standard peaks, as well as any known false positive peaks (including noise, column bleed, and derivatized reagent peaks), were removed from the data matrix, dereplicated, and peak pooled. At the same time, the metabolites were searched and identified, and the main database was the HMDB (<http://www.hmdb.ca/>), Metlin (<https://metlin.scripps.edu/>), and Majorbio Database.

The data after the database search is uploaded to the Majorbio cloud platform (<https://cloud.majorbio.com>) for data analysis. Metabolic features detected at least 80 % in any set of samples were retained. After filtering, minimum metabolite values were imputed for specific samples in which the metabolite levels fell below the lower limit of quantitation and each Metabolic feature was normalized by sum. To reduce the errors caused by sample preparation and instrument instability, the response intensity of the sample mass spectrum peaks was normalized by the sum normalization method, and the normalized data matrix was obtained. At the same time, variables with relative standard deviation (RSD) > 30% of QC samples were removed, and log<sub>10</sub> logarithmization was performed to obtain the final data matrix for subsequent analysis.

### **Differential metabolites analysis**

Perform variance analysis on the matrix file after data preprocessing. The R package *ropls* (Version 1.6.2) performed principal component analysis (PCA) and orthogonal least partial squares discriminant analysis (OPLS-DA) and used 7-cycle interactive validation to evaluate the stability of the model. In addition, the student's t-test and fold difference analysis were performed. The selection of significantly different metabolites was determined based on the Variable importance in the projection (VIP) obtained by the OPLS-DA model and the p-value of the student's t-test, and the metabolites with  $VIP > 1$ ,  $p < 0.05$  were significantly different. A total of 332 (pos) and 268 (neg) differential metabolites were screened.

Differential metabolites among two groups were summarized, and mapped into their biochemical pathways through metabolic enrichment and pathway analysis based on a database search (KEGG, <http://www.genome.jp/kegg/>). These metabolites can be classified according to the pathways they are involved in or the functions they perform. Enrichment analysis was usually to analyze a group of metabolites in a function node whether appears or not. The principle was that the annotation analysis of a single metabolite develops into an annotation analysis of a group of metabolites. *scipy.stats* (Python packages) (<https://docs.scipy.org/doc/scipy/>) was exploited to identify statistically significantly enriched pathways using Fisher's exact test.

### **Pearson correlation coefficient (PCC) analyze**

PCC was used to analyze the similarity and correlation between samples. As shown in Figure 6B (dotted box 1), the average PCC between XJW0 and XJW48 is 0.86, which implies that the two groups are highly positively correlated. In contrast, the dotted box

2 shows the control group (XJW: XJW0 and XJW48) and the exposed group (XJW+GO2, XJW+GO5, XJW+GO+UV, and XJW+UV) were not correlated strongly and were at a low level. The dotted box 3 shows the control group XJW+GO2 and XJW+GO5 were not correlated strongly with XJW0. While dotted box 4 (XJW+UV and XJW+GO+UV) shows a weaker correlation than dotted box 3 (XJW+GO). What is more, dotted box 5 (XJW+UV) showed a weak correlation to the groups without UV exposure, indicating the different effects between GO and UV exposure. The dotted box 6 (XJW+GO+UV) shows a strong correlation with XJW+UV and XJW+GO, indicating the combined effects of GO and UV exposure. Those results were approximately consistent with PCA analysis distinctions in the metabolic profiles (Figure 6A).

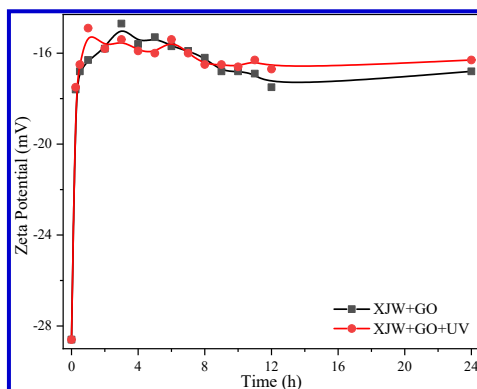

**Figure S1.** The zeta potential of CGO in XJW without/with UV exposure as a function of time (CGO: 20 mg/L).

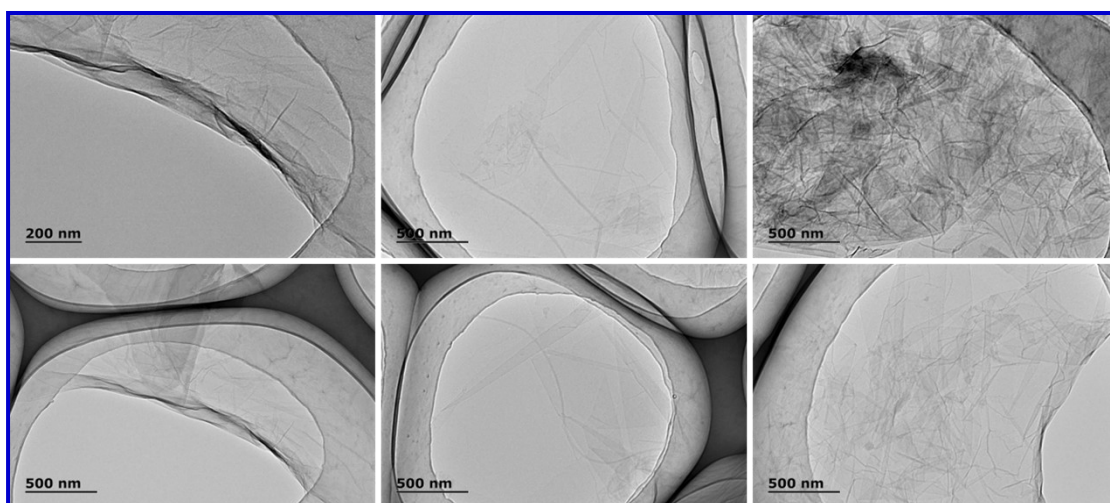

**Figure S2.** TEM images of CGO +XJW (CGO: 20 mg/L).

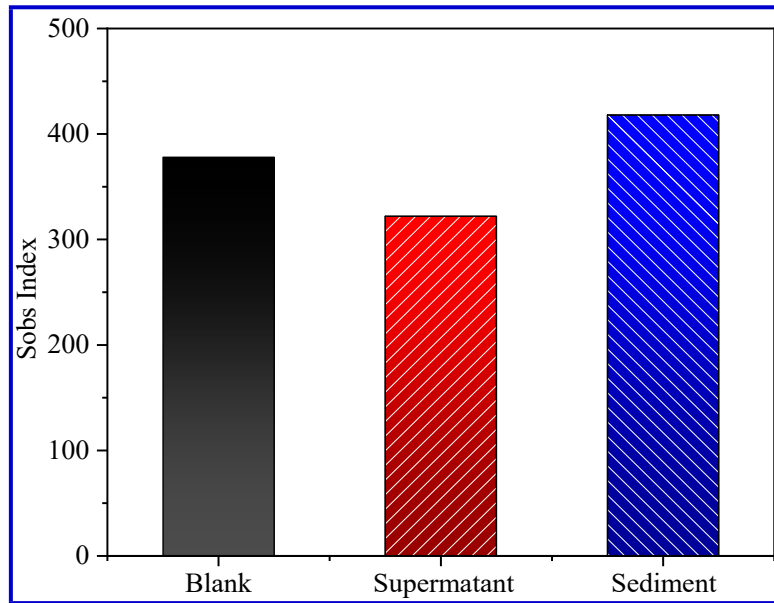

**Figure S3.** Comparison of Sobs index during the three groups.

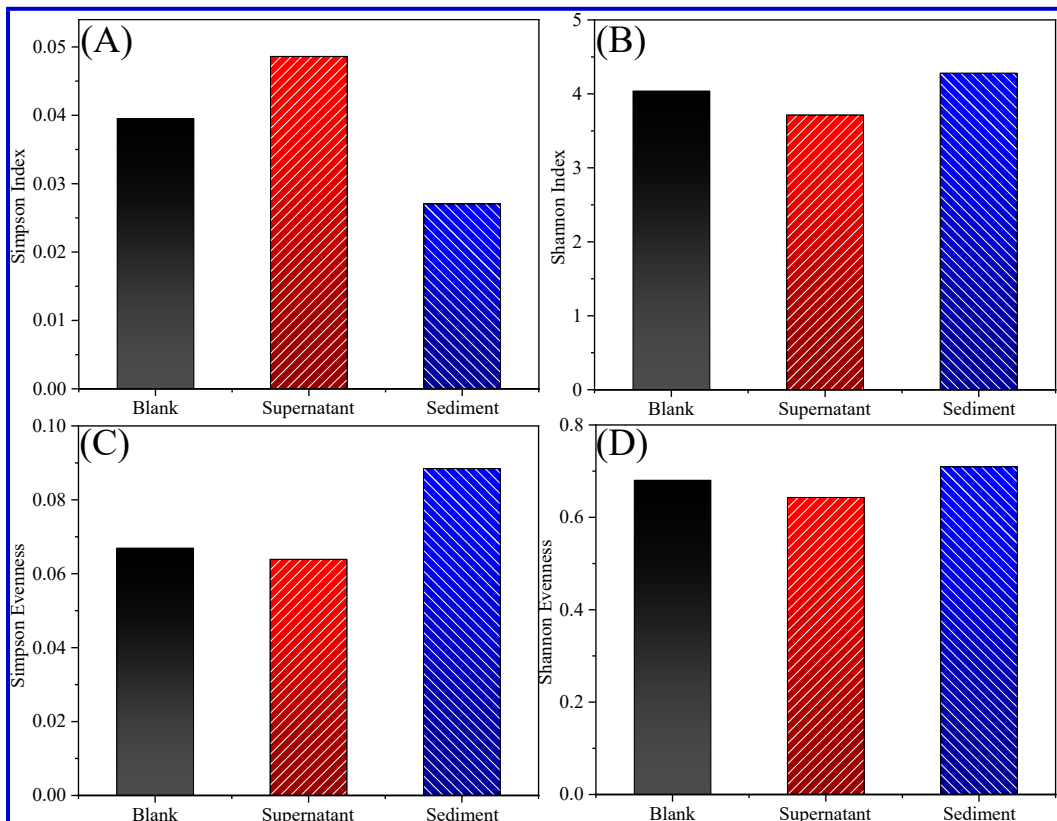

**Figure S4.** The  $\alpha$  diversity comparison of the three groups at the species level. Shannon index (A), Simpson index (B), Shannon evenness (C), and Simpson evenness (D).

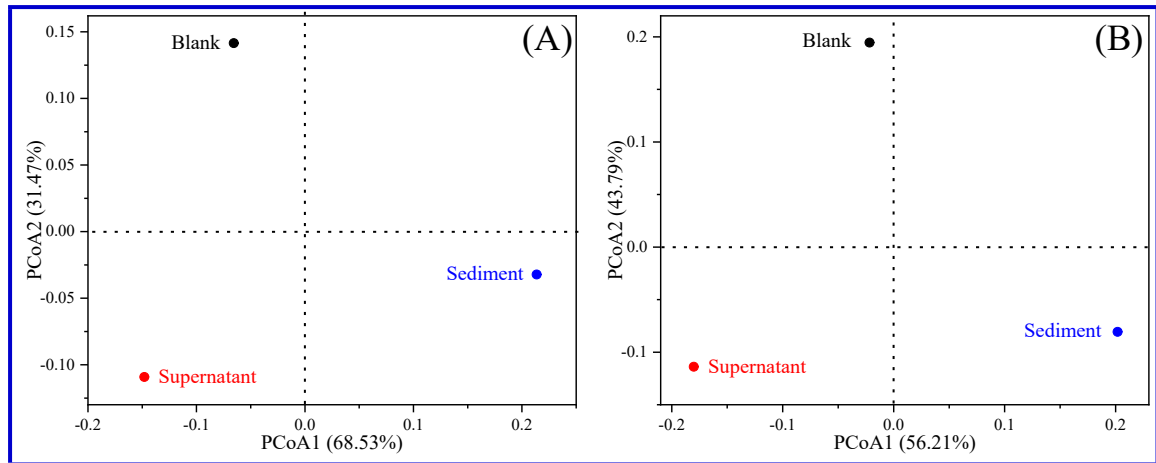

**Figure S5.** PCoA plots of Bray–Curtis distances at the genus (A) and species (B) levels.

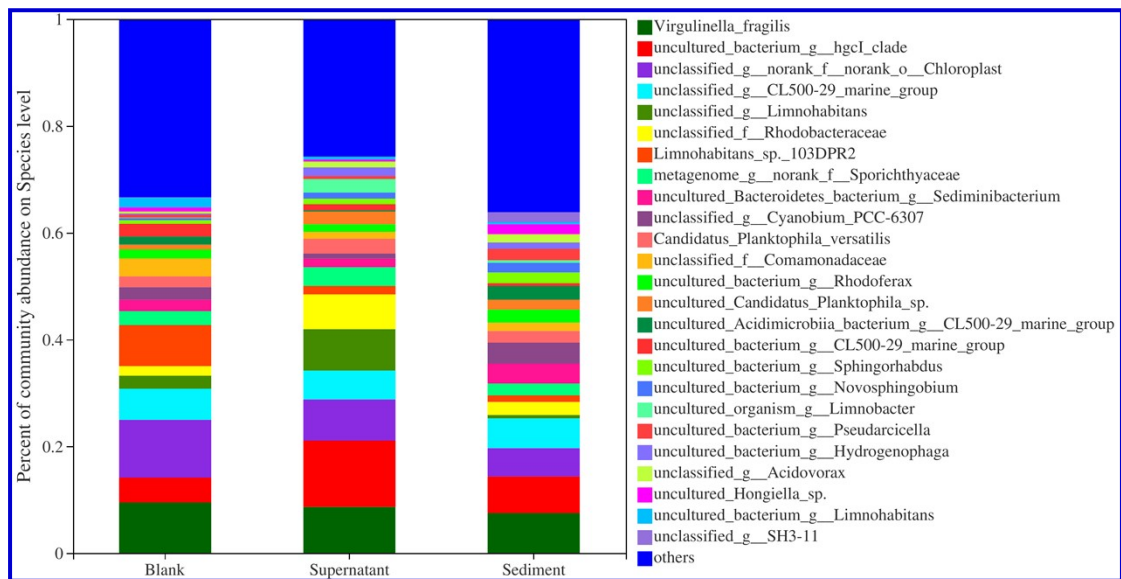

**Figure S6.** Relative abundance of the major bacteria species among different groups.

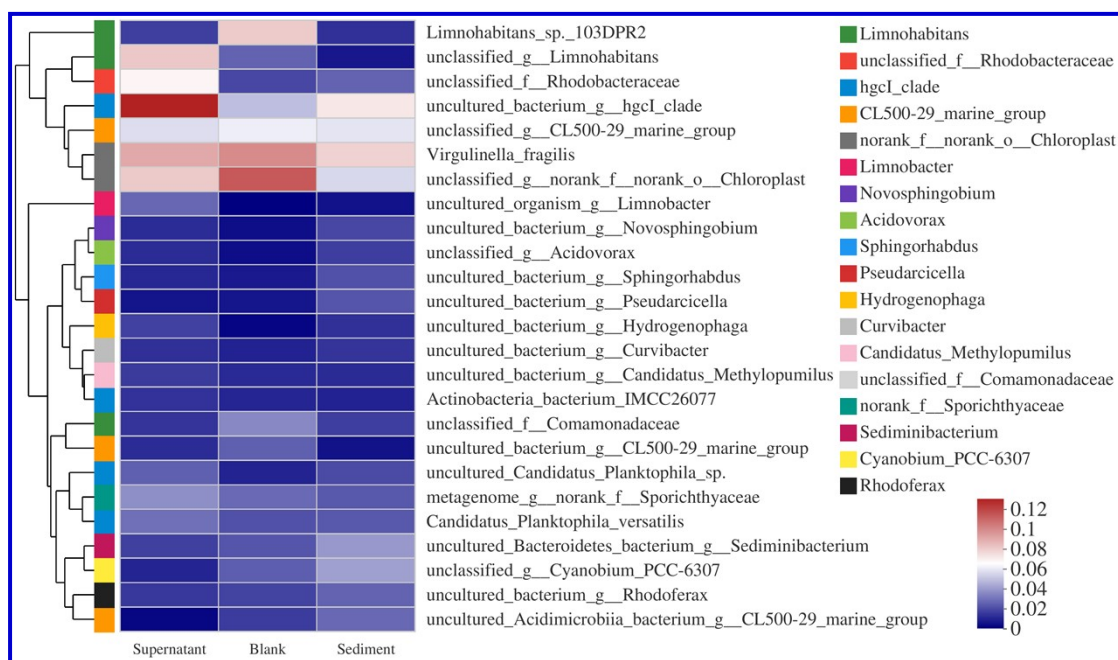

**Figure S7.** The microbial community heatmap analysis on species level.

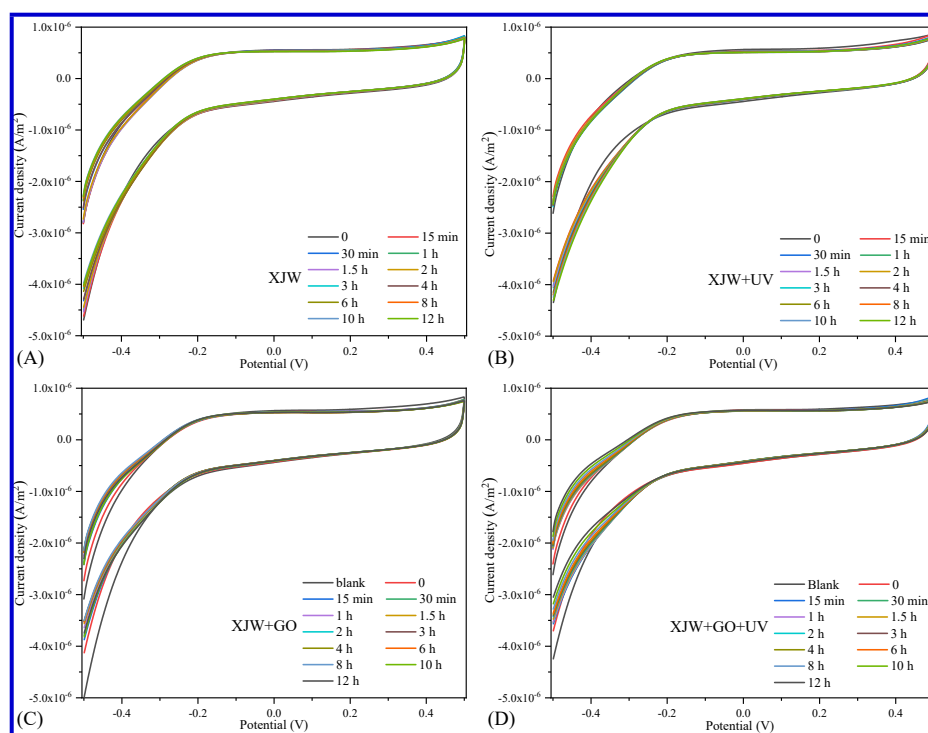

**Figure S8.** The cyclic voltammety curves of different aqueous solution systems. (A) XJW, (B) XJW+UV, (C) XJW+GO and (D) XJW+GO+UV.

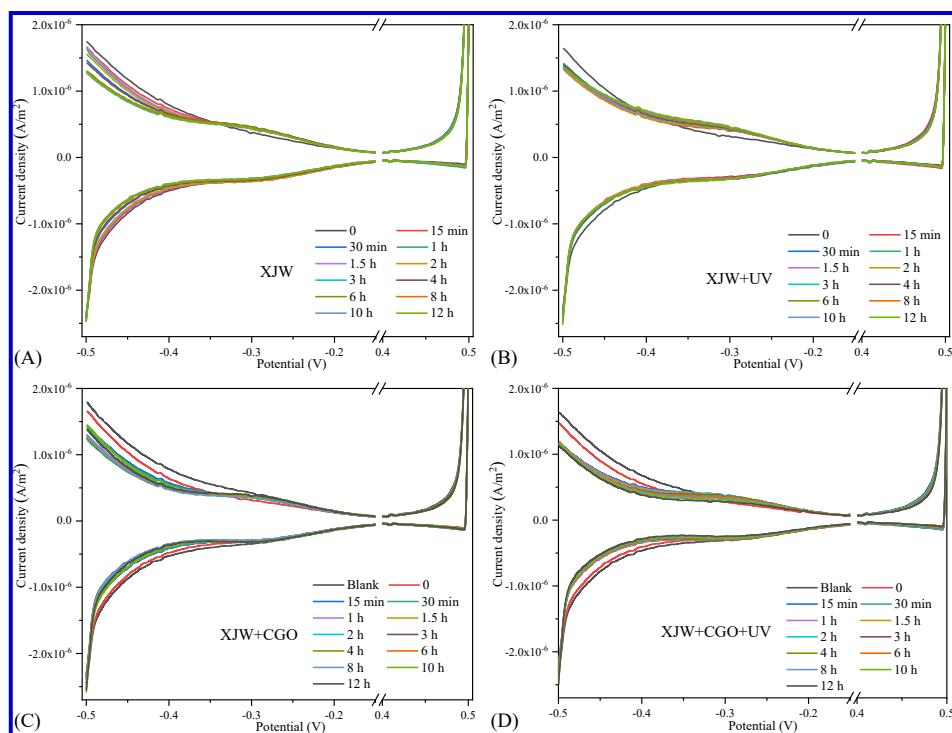

**Figure S9.** The first-order derivative of the cyclic voltammetry curves of different aqueous solution systems. (A) XJW, (B) XJW+UV, (C) XJW+GO and (D) XJW+GO+UV.

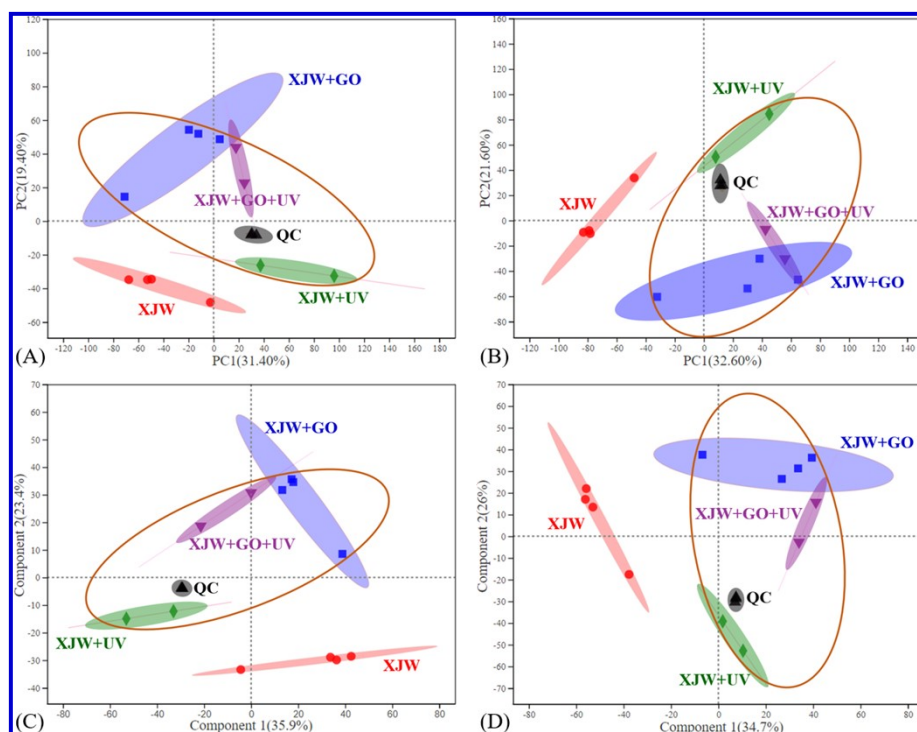

**Figure S10.** Integration of polar metabolites and transcript revealed toxicity induced by CGO. The PCA score plot of metabolites (A) pos, (B) neg; The PLS-DA score plot of metabolites (C) pos, (D) neg.



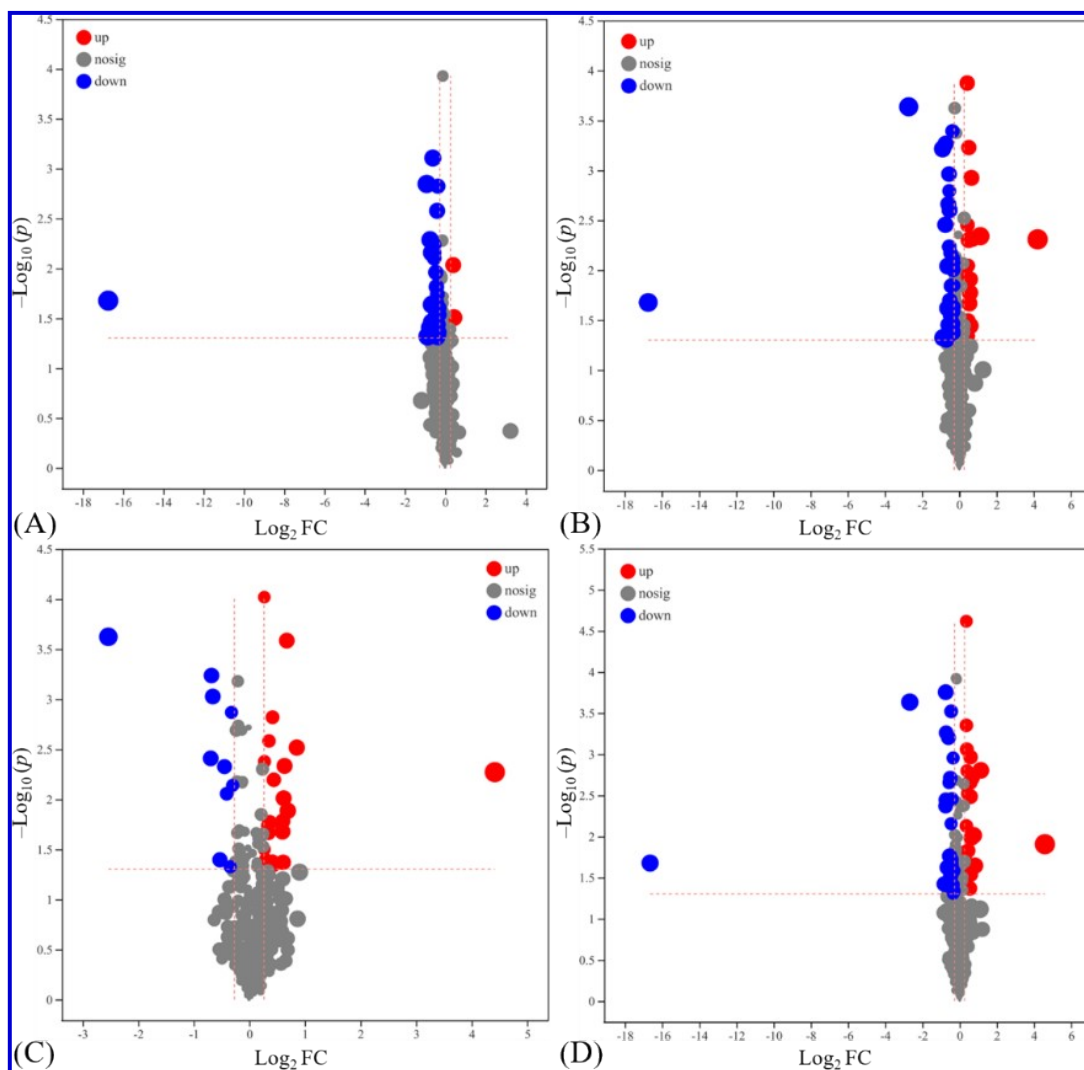

**Figure S11.** The volcano map of differential metabolites (pos+neg) of (A) GO2-XJW48, (B) GO5-XJW48, (C) UV-XJW48, and (D) GOUV-XJW48. (The red and blue dots were considered to indicate significantly upregulated and downregulated metabolites, respectively. Metabolites shown in gray dots were not significantly changed or those were not measured.)

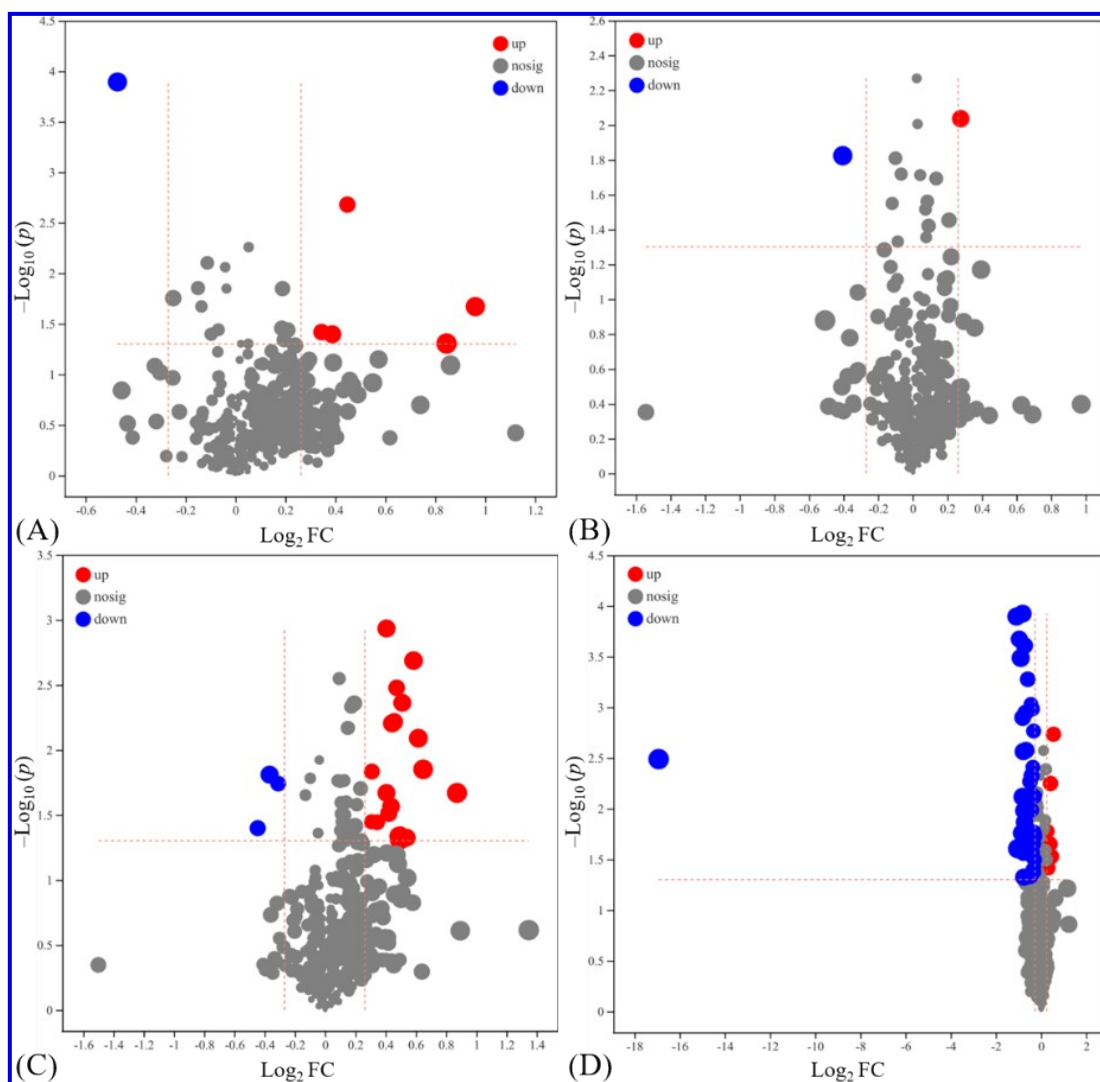

**Figure S12.** The volcano map of differential metabolites (pos+neg) of (A) XJW48-XJW0, (B) GO5-GO2, (C) GOUV-GO, and (D) GOUV-UV. (The red and blue dots were considered to indicate significantly upregulated and downregulated metabolites, respectively. Metabolites shown in gray dots were not significantly changed or those were not measured.)

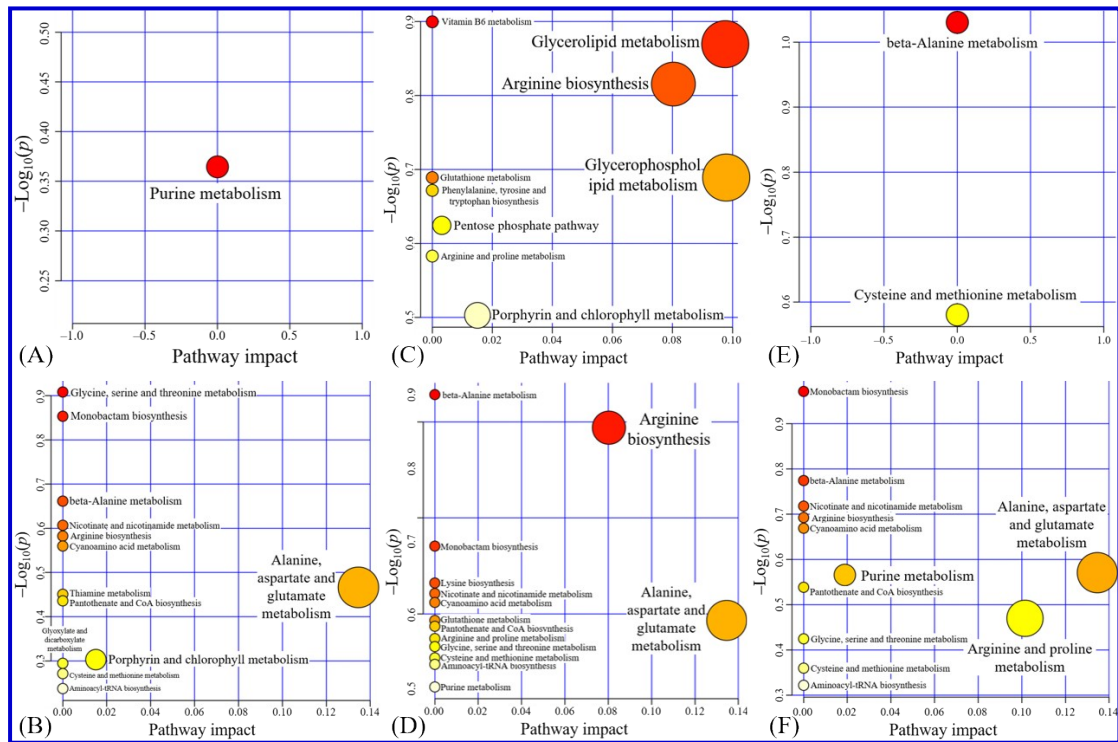

**Figure S13.** Significantly disturbed metabolic pathways in (A) GO2-XJW48; (B) GO5-XJW48; (C) UV-XJW48; (D) GOUV-XJW48; (E) GOUV-GO; (F) GOUV-UV.

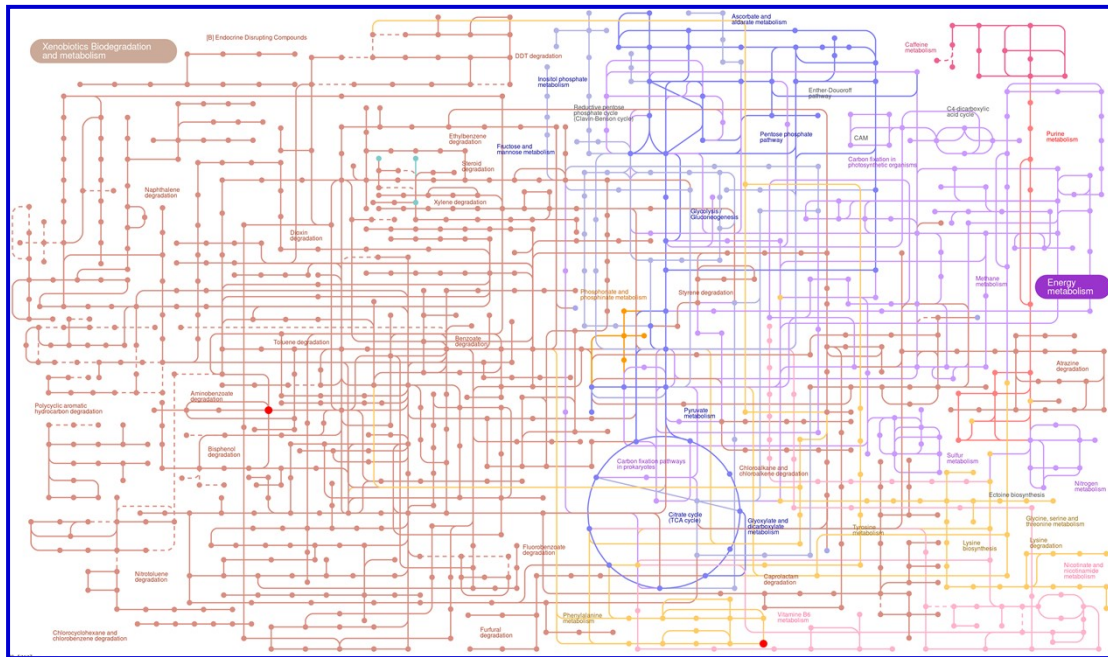

**Figure S14.** The microbial metabolism pathways of GO2-XJW48 were constructed based on the iPath 3 pathway database. Metabolites with an arresting red color are highlighted based on the comparisons of the treatment groups with the control.

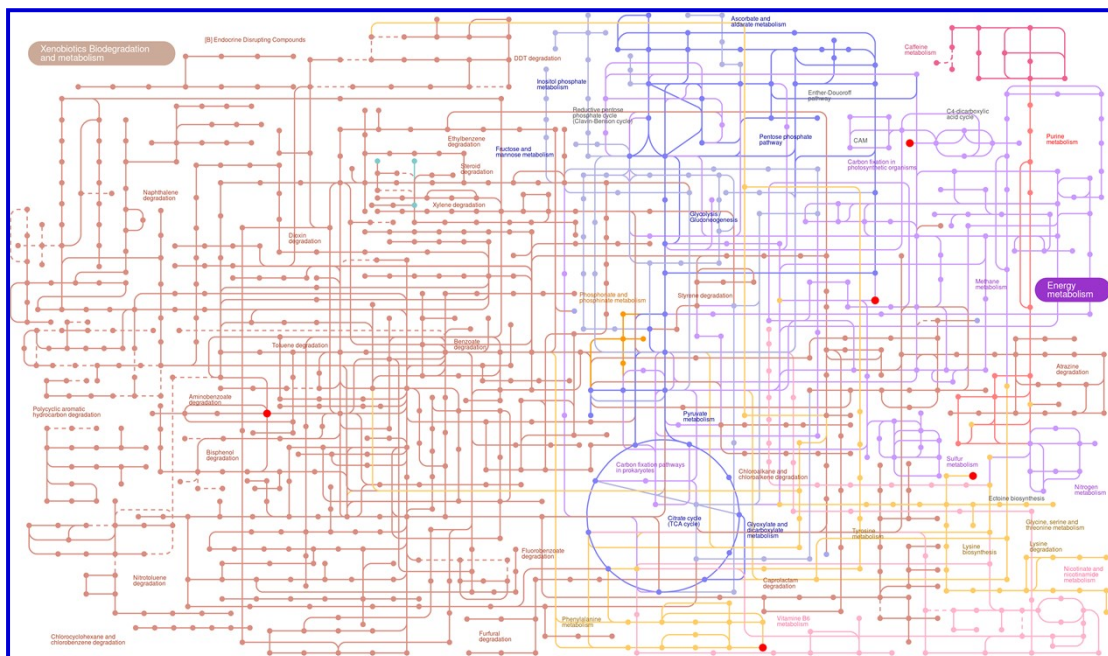

**Figure S15.** The microbial metabolism pathways of GO5-XJW48 were constructed based on the iPath 3 pathway database. Metabolites with an arresting red color are highlighted based on the comparisons of the treatment groups with the control.



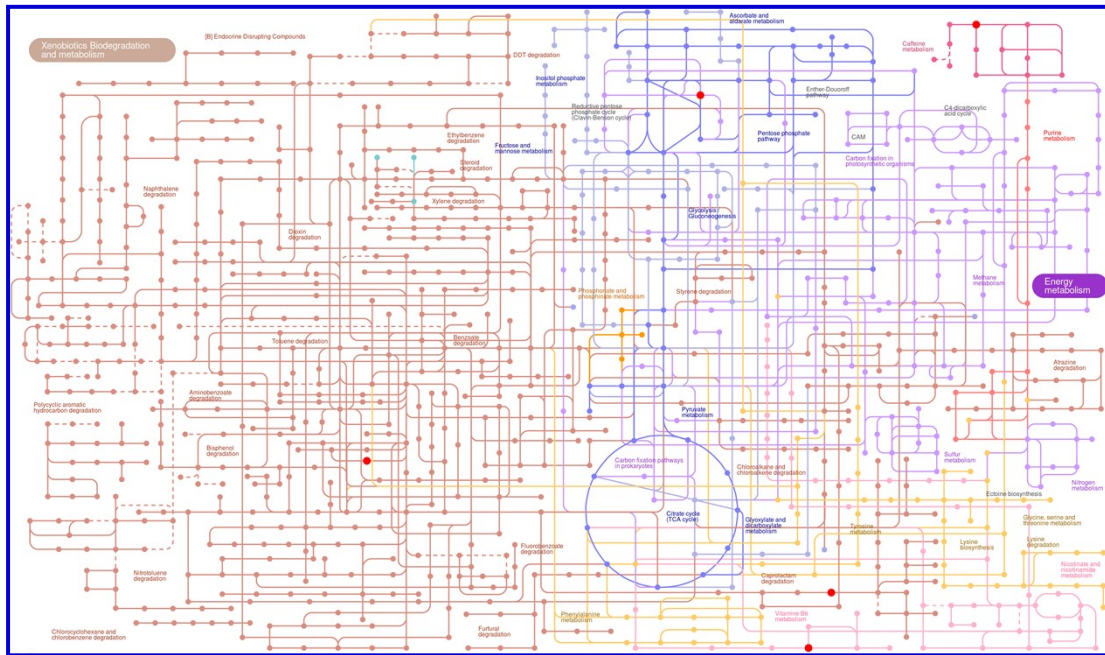

**Figure S16.** The microbial metabolism pathways of UV-XJW48 were constructed based on the iPath 3 pathway database. Metabolites with an arresting red color are highlighted based on the comparisons of the treatment groups with the control.

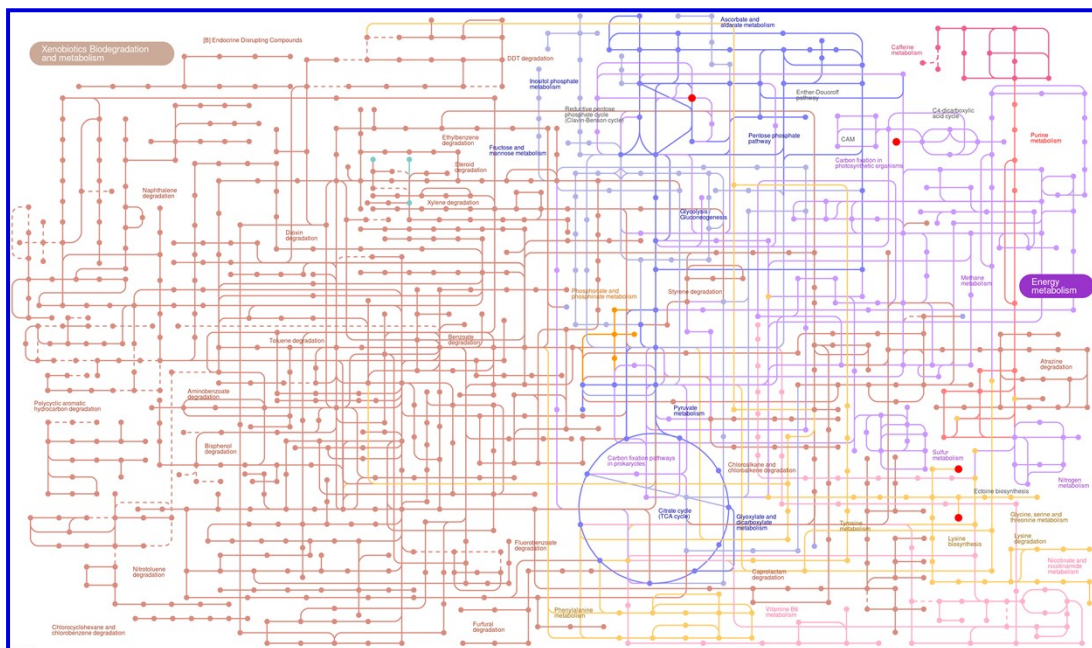

**Figure S17.** The microbial metabolism pathways of GOUV-XJW48 were constructed based on the iPath 3 pathway database. Metabolites with an arresting red color are highlighted based on the comparisons of the treatment groups with the control.

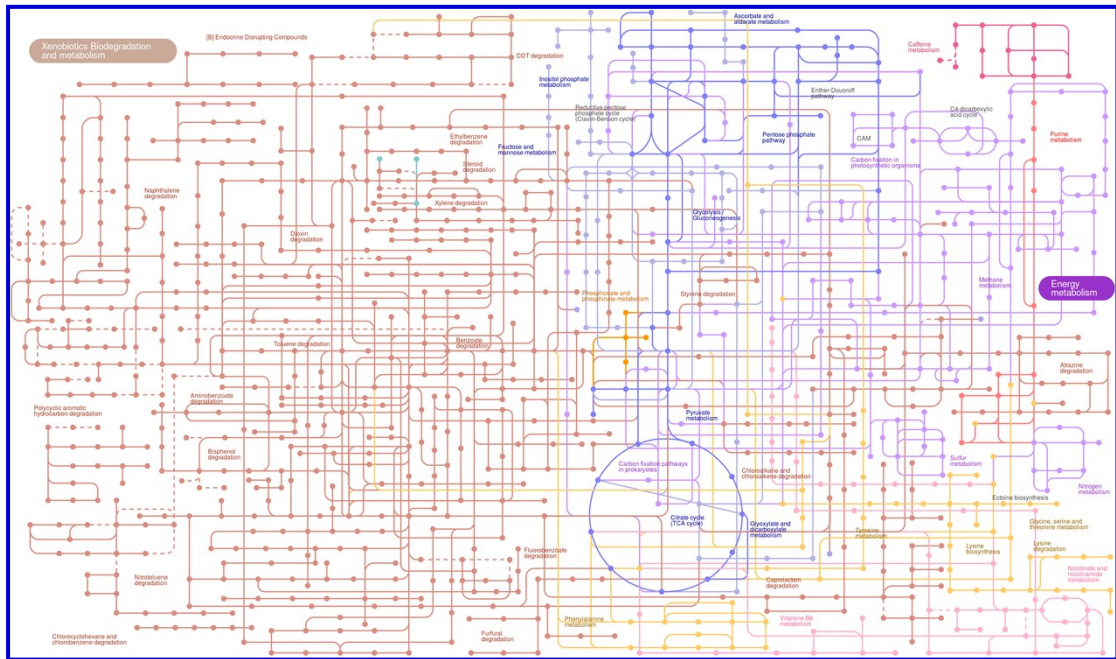

**Figure S18.** The microbial metabolism pathways of GO5-GO2 were constructed based on the iPath 3 pathway database. Metabolites with an arresting red color are highlighted based on the comparisons of the treatment groups with the control.

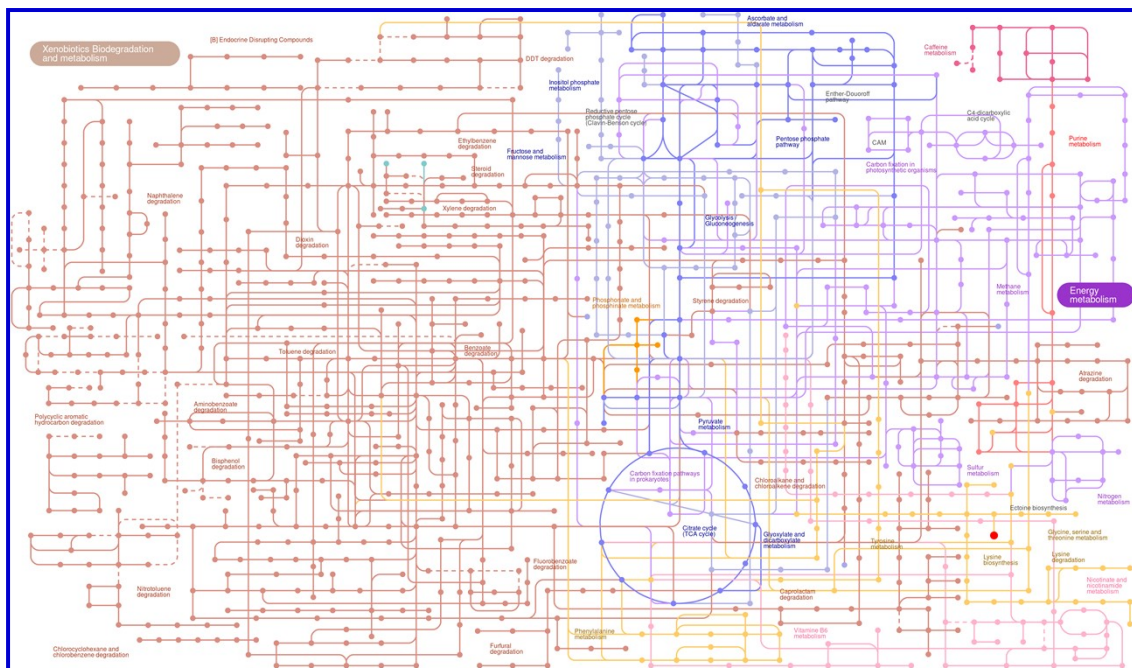

**Figure S19.** The microbial metabolism pathways of GOUV-GO2 were constructed based on the iPath 3 pathway database. Metabolites with arresting red color are highlighted based on the comparisons of the treatment groups with the control.

**Table S1.** Technical data of the commercial GO purchased from TIMESNANO<sup>a</sup>

| Name   | Purity    | layers | Thickness   | Diameter      | Color | Selling State |
|--------|-----------|--------|-------------|---------------|-------|---------------|
| GO Gel | > 99 wt % | < 3    | 0.55–1.2 nm | 0.5–3 $\mu$ m | Brown | Water Gel     |

<sup>a</sup>[Http://www.timesnano.com](http://www.timesnano.com)

**Table S2.** Physicochemical properties of the XJW.

| Water type | pH  | TOC (mg/L) | K (mM) | Na (mM) | Mg (mM) | Ca (mM) | Cond (ms/cm) |
|------------|-----|------------|--------|---------|---------|---------|--------------|
| XJW        | 8.3 | 1.91       | 0.11   | 0.50    | 0.22    | 0.92    | 0.312        |

**Table S3.** The Raman peak analysis of D-bond and G-bond by Gaussian.

| Sample         | Peak   | P ( $\text{cm}^{-1}$ ) | H       | FWHM   | Area      | $I_D/I_G$ |
|----------------|--------|------------------------|---------|--------|-----------|-----------|
| CGO+XJW        | D-bond | 1362.41                | 3359.95 | 161.32 | 576984.77 | 1.25      |
|                | G-bond | 1583.78                | 3870.89 | 111.95 | 461320.08 |           |
| CGO+XJW<br>+UV | D-bond | 1361.40                | 3331.36 | 172.20 | 607099.91 | 1.42      |
|                | G-bond | 1587.42                | 3806.35 | 105.86 | 428925.04 |           |

**Table S4.** XPS data of the C 1s and O 1s of the CGO, CGO+XJW, and CGO+XJW+UV.

| Sample     | C (eV) |        |        | O (eV) |        |        |
|------------|--------|--------|--------|--------|--------|--------|
|            | C=C    | C-O    | C=O    | C=O    | O-H    | C-O-C  |
| CGO        | 284.35 | 286.31 | 288.03 | 531.16 | 532.16 | 532.92 |
| CGO+XJW    | 284.11 | 286.03 | 287.57 | 530.72 | 531.88 | 532.72 |
| CGO+XJW+UV | 283.86 | 285.70 | 287.55 | 530.81 | 531.88 | 532.79 |

  

| Sample     | C (Area) |          |         | O (Area) |          |         |
|------------|----------|----------|---------|----------|----------|---------|
|            | C=C      | C-O      | C=O     | C=O      | O-H      | C-O-C   |
| CGO        | 135702.9 | 118929.2 | 23101.0 | 93100.4  | 158724.4 | 97199.9 |
| CGO+XJW    | 200962.4 | 109231.9 | 32210.1 | 92937.5  | 136467.3 | 98194.6 |
| CGO+XJW+UV | 231307.0 | 84357.4  | 29884.3 | 145634.1 | 98174.8  | 63535.9 |



**Table S5.** The relative abundance (%) of major bacterial phyla and genera in Sediment (SM), Supernatant (SN), and Blank (BL).

| <b>Phylum</b> | Proteobacteria | Actinobacteriota | Cyanobacteria | Bacteroidota | Others | Verrucomicrobiota | Planctomycetota |
|---------------|----------------|------------------|---------------|--------------|--------|-------------------|-----------------|
| SM            | 34             | 25               | 17            | 16           | 2.6    | 2.7               | 1.4             |
| SN            | 43             | 32               | 19            | 4.6          | 1.7    | 0.19              | 0.17            |
| BL            | 38             | 25               | 24            | 8.9          | 3.5    | 0.44              | 0.69            |

  

| <b>Genus</b> | Others | Norank_f_norank_o_Chloroplast | Hgcl_clade | CL500-29_Marine_group | Limnohabitans | Unclassified_f_Rhodobacteraceae | Cyanobium_PCC-6307 |
|--------------|--------|-------------------------------|------------|-----------------------|---------------|---------------------------------|--------------------|
| SM           | 57     | 13                            | 12         | 9.1                   | 2.2           | 2.5                             | 4.1                |
| SN           | 38     | 18                            | 20         | 6.9                   | 9.9           | 6.5                             | 0.97               |
| BL           | 43     | 22                            | 9.5        | 10                    | 12            | 1.8                             | 2.4                |

**Table S6.** The comparison of the relative abundance (%) of major bacterial phyla and genera among Sediment (SM), Supernatant (SN), and Blank (BL).

| Phylum            | SM | SN  | BL | Genus                           | SM  | SN | BL |
|-------------------|----|-----|----|---------------------------------|-----|----|----|
| Proteobacteria    | 30 | 37  | 33 | Others                          | 41  | 28 | 31 |
| Actinobacteriota  | 31 | 39  | 30 | Norank_f_norank_o_Chloroplast   | 25  | 34 | 41 |
| Cyanobacteria     | 29 | 31  | 40 | Hgcl_clade                      | 29  | 48 | 22 |
| Bacteroidota      | 55 | 15  | 30 | CL500-29_Marine_group           | 35  | 26 | 39 |
| Others            | 34 | 22  | 44 | Limnohabitans                   | 9.3 | 41 | 50 |
| Verrucomicrobiota | 81 | 5.7 | 13 | Unclassified_f_Rhodobacteraceae | 23  | 60 | 17 |
| Planctomycetota   | 63 | 7.6 | 30 | Cyanobium_PCC-6307              | 55  | 13 | 32 |

**Table S7.** The statistical table of differential metabolism in different groups. A fold change (FC) > 1.2 and p < 0.05 or fold change < 0.83 and p < 0.05 were considered to indicate significantly upregulated and downregulated metabolites, respectively.

| Mode  | Total number | GO2-XJW48 | GO5-XJW48 | UV-XJW48 | GOUV-XJW48 |
|-------|--------------|-----------|-----------|----------|------------|
| pos   | 905(45)      | 236(13)   | 563(26)   | 307(14)  | 499(30)    |
| neg   | 1706(59)     | 480(21)   | 1075(32)  | 561(18)  | 1052(30)   |
| Total | 2611(104)    | 716(34)   | 1638(58)  | 868(32)  | 1551(60)   |
| Mode  | XJW48-XJW0   | GO5-GO2   | GOUV-GO   | GOUV-UV  |            |
| pos   | 29(3)        | 87(0)     | 160(11)   | 369(30)  |            |
| neg   | 98(3)        | 59(2)     | 147(11)   | 604(26)  |            |
| Total | 127(6)       | 146(2)    | 307(22)   | 973(56)  |            |

**Table S8.** The variable importance in the projection (VIP), Fold change (FC), *p*-value, and false discovery rate (FDR) value in metabolites abundance of GO2-XJW48. The  $FC > 1.2$  and  $p < 0.05$  or  $FC < 0.83$  and  $p < 0.05$  were considered to indicate significantly upregulated and downregulated metabolites, respectively.

| Mode ID  | Metabolite                                              | VIP (OPLS-DA) | VIP (PLS-DA) | FC     | P_value   | FDR    |
|----------|---------------------------------------------------------|---------------|--------------|--------|-----------|--------|
| neg_7660 | Seryltryptophan                                         | 3.1456        | 2.9928       | 0      | 0.02104   | 0.3956 |
| pos_851  | Asp-Val-OH                                              | 2.7009        | 2.6046       | 0.5475 | 0.04789   | 0.6552 |
| pos_7859 | Vaccinoside                                             | 2.6406        | 2.548        | 0.6378 | 0.006953  | 0.4856 |
| neg_9680 | Fructosamine                                            | 2.6222        | 2.5362       | 0.5285 | 0.001425  | 0.3731 |
| pos_904  | Lumichrome                                              | 2.5534        | 2.4614       | 0.63   | 0.02308   | 0.6053 |
| pos_7175 | Succinoadenosine                                        | 2.5316        | 2.4406       | 0.5902 | 0.03927   | 0.6443 |
| neg_4274 | Hexadecanedioic acid mono-L-carnitine ester             | 2.4511        | 2.3173       | 0.6299 | 0.03463   | 0.4127 |
| neg_3893 | Butyl (S)-3-hydroxybutyrate glucoside                   | 2.3617        | 2.2628       | 0.5935 | 0.00517   | 0.3731 |
| pos_6460 | 5-Hydroxysulfamethoxazole                               | 2.3499        | 2.2651       | 0.6733 | 0.03589   | 0.6408 |
| neg_1939 | Threoninyl-Gamma-glutamate                              | 2.3056        | 2.1708       | 0.6364 | 0.04483   | 0.432  |
| pos_5791 | Tangeritin                                              | 2.3           | 2.2302       | 0.7242 | 0.03903   | 0.6443 |
| pos_6936 | 5-Hydroxy-L-tryptophan                                  | 2.2727        | 2.1963       | 0.6526 | 0.0007831 | 0.3686 |
| pos_3933 | Austalide L                                             | 2.2553        | 2.212        | 1.3475 | 0.03113   | 0.6397 |
| pos_6937 | 1H-Indole-3-acetamide                                   | 2.1717        | 2.0834       | 0.6916 | 0.03208   | 0.6397 |
| pos_3542 | (1R*,2R*,4R*,8S*)-p-Menthane-1,2,8,9-tetrol 9-glucoside | 2.0322        | 1.9669       | 0.7567 | 0.002649  | 0.3913 |
| neg_5984 | PE(15:0/0:0)                                            | 2.0296        | 2.0053       | 0.7162 | 0.04223   | 0.4271 |
| neg_4719 | PG(16:0/0:0)[U]                                         | 2.0251        | 1.9577       | 0.7344 | 0.02233   | 0.3975 |
| pos_3664 | (S)-10,16-Dihydroxyhexadecanoic acid                    | 2.0001        | 1.9323       | 1.3183 | 0.009258  | 0.5331 |
| neg_2875 | Tyrosyl-Proline                                         | 1.9479        | 1.8411       | 0.709  | 0.03127   | 0.4082 |
| neg_7629 | Gamma-Glutamylphenylalanine                             | 1.9416        | 1.8607       | 0.669  | 0.005801  | 0.3731 |

|          |                                                                                                                             |        |        |        |          |        |
|----------|-----------------------------------------------------------------------------------------------------------------------------|--------|--------|--------|----------|--------|
| pos_3393 | 6-{[3-(2,4-dihydroxyphenyl)propanoyl]oxy}-3,4,5-trihydroxyoxane-2-carboxylic acid                                           | 1.9236 | 1.8539 | 0.8001 | 0.04368  | 0.6552 |
| neg_4371 | Corchorifatty acid A                                                                                                        | 1.8923 | 1.8229 | 0.738  | 0.01531  | 0.3774 |
| neg_4782 | Gamma-Eudesmol rhamnoside                                                                                                   | 1.8299 | 1.7785 | 0.7219 | 0.01097  | 0.3731 |
| neg_8440 | Xanthopterin                                                                                                                | 1.8134 | 1.7072 | 0.6796 | 0.0432   | 0.4271 |
| pos_3761 | Monotropein                                                                                                                 | 1.7957 | 1.7338 | 0.7772 | 0.0015   | 0.3686 |
| neg_2788 | Valyl-Proline                                                                                                               | 1.7672 | 1.6812 | 0.7706 | 0.04957  | 0.4424 |
| neg_9003 | A-L-Arabinofuranosyl-(1->2)-[a-D-mannopyranosyl-(1->6)]-D-mannose                                                           | 1.7276 | 1.6524 | 0.762  | 0.01817  | 0.3775 |
| neg_5933 | PE(16:0/0:0)                                                                                                                | 1.7174 | 1.6245 | 0.8142 | 0.02903  | 0.4027 |
| neg_7015 | S-Nitrosoglutathione                                                                                                        | 1.7009 | 1.6916 | 0.8095 | 0.02484  | 0.3975 |
| neg_7164 | Indolelactic acid                                                                                                           | 1.6767 | 1.6202 | 0.6837 | 0.007912 | 0.3731 |
| neg_2295 | 6-({3,5-dihydroxy-2-methyl-6-[(3,4,5,6-tetrahydroxyoxan-2-yl)methoxy]oxan-4-yl}oxy)-3,4,5-trihydroxyoxane-2-carboxylic acid | 1.6126 | 1.5631 | 0.7981 | 0.03647  | 0.4165 |
| neg_9122 | ADP-ribose                                                                                                                  | 1.5448 | 1.5136 | 0.7645 | 0.03379  | 0.4116 |
| neg_6254 | 3b-Hydroxy-6b-methoxy-7(11)-eremophilen-12,8a-olide                                                                         | 1.5008 | 1.411  | 0.7813 | 0.04816  | 0.4413 |
| neg_6156 | (10Z,14E,16E)-10,14,16-Octadecatrien-12-ynoic acid                                                                          | 1.4014 | 1.319  | 0.8253 | 0.04581  | 0.433  |

**Table S9.** The variable importance in the projection (VIP), Fold change (FC), *p*-value, and false discovery rate (FDR) value in metabolites abundance of GO5-XJW48. The FC > 1.2 and *p* < 0.05 or FC < 0.83 and *p* < 0.05 were considered to indicate significantly upregulated and downregulated metabolites, respectively.

| Mode ID  | Metabolite                                                                                                    | VIP (OPLS-DA) | VIP (PLS-DA) | FC      | P_value   | FDR     |
|----------|---------------------------------------------------------------------------------------------------------------|---------------|--------------|---------|-----------|---------|
| pos_2802 | (15a,20R)-Dihydroxypregn-4-en-3-one 20-[glucosyl-(1->4)-6-acetyl-glucoside]                                   | 3.2377        | 3.2213       | 18.5772 | 0.004911  | 0.1331  |
| neg_6907 | 2-{{hydroxy(4-methoxy-1-benzofuran-5-yl)methylidene}amino}acetic acid                                         | 2.8491        | 2.8489       | 0.1518  | 0.0002312 | 0.0299  |
| neg_7660 | Seryltryptophan                                                                                               | 2.7576        | 2.7575       | 0       | 0.02104   | 0.1202  |
| neg_3278 | (6-carboxy-3,4,5-trihydroxyoxan-2-yl)[2-(3,4-dihydroxyphenyl)-3,5,6-trihydroxy-7H-chromen-7-ylidene]oxidanium | 2.6233        | 2.6232       | 2.1916  | 0.00457   | 0.0498  |
| pos_851  | Asp-Val-OH                                                                                                    | 2.3928        | 2.38         | 0.5463  | 0.04747   | 0.2435  |
| neg_9680 | Fructosamine                                                                                                  | 2.3172        | 2.317        | 0.5365  | 0.0006096 | 0.04177 |
| pos_7859 | Vaccinoside                                                                                                   | 2.2796        | 2.2656       | 0.6524  | 0.009106  | 0.1729  |
| pos_3664 | (S)-10,16-Dihydroxyhexadecanoic acid                                                                          | 2.183         | 2.1745       | 1.5069  | 0.03603   | 0.2107  |
| pos_5791 | Tangeritin                                                                                                    | 2.178         | 2.1656       | 0.6902  | 0.024     | 0.1978  |
| pos_7175 | Succinoadenosine                                                                                              | 2.1501        | 2.1371       | 0.6183  | 0.04938   | 0.247   |
| neg_4274 | Hexadecanedioic acid mono-L-carnitine ester                                                                   | 2.1259        | 2.1259       | 0.642   | 0.02404   | 0.1287  |
| pos_904  | Lumichrome                                                                                                    | 2.0983        | 2.0887       | 0.6718  | 0.04468   | 0.2356  |
| neg_3893 | Butyl (S)-3-hydroxybutyrate glucoside                                                                         | 2.0847        | 2.0845       | 0.5956  | 0.00351   | 0.04901 |
| pos_6460 | 5-Hydroxysulfamethoxazole                                                                                     | 2.0814        | 2.0699       | 0.6721  | 0.03532   | 0.2083  |
| neg_7149 | 16,17-Dihydro-16a,17-dihydroxygibberellin A4 17-glucoside                                                     | 2.0775        | 2.0775       | 1.4928  | 0.01683   | 0.1048  |
| neg_6891 | 5'-Deoxy-5-fluorouridine                                                                                      | 2.0518        | 2.0517       | 0.601   | 0.0005417 | 0.04115 |
| neg_6844 | 5'-((Z)-Feruloyl) 3-(2'-methylarabinosylxylose)                                                               | 2.017         | 2.0169       | 1.6494  | 0.004843  | 0.05184 |

|          |                                                                                                                                                                             |        |        |        |           |         |
|----------|-----------------------------------------------------------------------------------------------------------------------------------------------------------------------------|--------|--------|--------|-----------|---------|
| neg_7153 | 3,4,5-trihydroxy-6-(2-methyl-3-phenylpropoxy) oxane-2-carboxylic acid                                                                                                       | 2.0144 | 2.0142 | 1.5716 | 0.001191  | 0.04901 |
| pos_8202 | 5,7-dihydroxy-2-phenyl-8-(3,4,5-trihydroxyoxan-2-yl)-4H-chromen-4-one                                                                                                       | 2.0099 | 1.9986 | 1.4161 | 0.004993  | 0.1331  |
| pos_3542 | (1R*,2R*,4R*,8S*)-p-Menthane-1,2,8,9-tetrol 9-glucoside                                                                                                                     | 1.9999 | 1.9889 | 0.6971 | 0.002508  | 0.09936 |
| pos_7644 | PELLETIERINE                                                                                                                                                                | 1.9981 | 1.9875 | 1.4607 | 0.02154   | 0.1978  |
| pos_6936 | 5-Hydroxy-L-tryptophan                                                                                                                                                      | 1.9656 | 1.955  | 0.6642 | 0.00218   | 0.09272 |
| neg_3848 | Thiamine triphosphate                                                                                                                                                       | 1.9296 | 1.9295 | 1.5011 | 0.01233   | 0.08906 |
| pos_6631 | 4-AMINOETHYLBENZENESULFONYL FLUORIDE                                                                                                                                        | 1.9227 | 1.9122 | 0.682  | 0.001091  | 0.06865 |
| pos_3274 | Aloe emodin anthrone                                                                                                                                                        | 1.8755 | 1.865  | 1.3441 | 0.0001338 | 0.03927 |
| neg_5984 | PE(15:0/0:0)                                                                                                                                                                | 1.863  | 1.8626 | 0.702  | 0.02013   | 0.1175  |
| neg_1774 | L-Aspartic Acid                                                                                                                                                             | 1.8624 | 1.8622 | 0.7097 | 0.03989   | 0.1708  |
| neg_3846 | Quercetagitrin                                                                                                                                                              | 1.8523 | 1.8524 | 1.4446 | 0.01274   | 0.09071 |
| pos_3933 | Austalide L                                                                                                                                                                 | 1.8462 | 1.8381 | 1.3065 | 0.04593   | 0.2391  |
| neg_7136 | 6-{{[1,3-dihydroxy-1-(1-oxo-1H-isochromen-3-yl)butan-2-yl]oxy}-3,4,5-trihydroxyoxane-2-carboxylic acid                                                                      | 1.8246 | 1.8245 | 1.429  | 0.0005919 | 0.04157 |
| pos_8602 | Imidazoleacetic acid riboside                                                                                                                                               | 1.8146 | 1.8014 | 1.3558 | 0.0456    | 0.2386  |
| neg_4719 | PG(16:0/0:0)[U]                                                                                                                                                             | 1.7958 | 1.7955 | 0.7417 | 0.01438   | 0.09671 |
| pos_1892 | Glutamylthreonine                                                                                                                                                           | 1.7813 | 1.7722 | 0.7852 | 0.03446   | 0.2052  |
| pos_6937 | 1H-Indole-3-acetamide                                                                                                                                                       | 1.7578 | 1.7492 | 0.7386 | 0.03168   | 0.1978  |
| pos_6162 | 6-(Allylthio)purine                                                                                                                                                         | 1.7289 | 1.7196 | 0.7927 | 0.009898  | 0.1769  |
| pos_8500 | 2,6-Piperidinedicarboxylic acid                                                                                                                                             | 1.7112 | 1.7035 | 0.7912 | 0.04079   | 0.2248  |
| pos_3393 | 6-{{[3-(2,4-dihydroxyphenyl)propanoyl]oxy}-3,4,5-trihydroxyoxane-2-carboxylic acid                                                                                          | 1.7061 | 1.6969 | 0.7991 | 0.04256   | 0.2298  |
| neg_6665 | 3,4,5-trihydroxy-6-({11-methoxy-13-oxo-6,8,20-trioxapentacyclo[10.8.0.0 <sup>2</sup> , <sup>9</sup> .0 <sup>3</sup> , <sup>7</sup> .0 <sup>14</sup> , <sup>19</sup> ]icosa- | 1.7021 | 1.7019 | 1.3945 | 0.03196   | 0.1518  |

| 1(12),2(9),10,14(19),15,17-hexaen-15-yl}oxy)oxane-2-carboxylic acid |                                                     |        |        |        |           |         |
|---------------------------------------------------------------------|-----------------------------------------------------|--------|--------|--------|-----------|---------|
| neg_2875                                                            | Tyrosyl-Proline                                     | 1.6999 | 1.6999 | 0.7112 | 0.02832   | 0.1418  |
| neg_5918                                                            | 11Z-Eicosenoic acid                                 | 1.6886 | 1.6886 | 0.7376 | 0.03338   | 0.1552  |
| neg_7629                                                            | Gamma-Glutamylphenylalanine                         | 1.6696 | 1.6695 | 0.6878 | 0.005823  | 0.05985 |
| pos_6881                                                            | 5-Methoxyindoleacetate                              | 1.669  | 1.659  | 1.361  | 0.003532  | 0.1184  |
| neg_4782                                                            | Gamma-Eudesmol rhamnoside                           | 1.6373 | 1.6371 | 0.7242 | 0.006739  | 0.06432 |
| pos_6766                                                            | N1-(alpha-D-ribose)-5,6-dimethyl-benzimidazole      | 1.635  | 1.6273 | 1.2619 | 0.01152   | 0.1886  |
| neg_3708                                                            | 3-Hydroxyquinine                                    | 1.621  | 1.6206 | 0.7149 | 0.03991   | 0.1708  |
| neg_6046                                                            | PE(15:1/0:0)                                        | 1.6184 | 1.6183 | 0.7839 | 0.007632  | 0.06951 |
| neg_6910                                                            | Polyethylene, oxidized                              | 1.6013 | 1.6012 | 1.384  | 0.009025  | 0.07568 |
| pos_3761                                                            | Monotropein                                         | 1.5873 | 1.5784 | 0.7756 | 0.0004051 | 0.05312 |
| neg_394                                                             | 1,4-beta-D-Glucan                                   | 1.5865 | 1.5865 | 1.3184 | 0.00937   | 0.07703 |
| neg_8440                                                            | Xanthopterin                                        | 1.5772 | 1.5772 | 0.6824 | 0.0396    | 0.1703  |
| neg_4727                                                            | 13,14-Dihydro-15-keto-PGE2                          | 1.5385 | 1.5384 | 0.7996 | 0.02618   | 0.1353  |
| pos_5977                                                            | Monic acid                                          | 1.5343 | 1.5256 | 0.8063 | 0.02313   | 0.1978  |
| neg_7164                                                            | Indolelactic acid                                   | 1.4942 | 1.4941 | 0.6869 | 0.001609  | 0.04901 |
| neg_179                                                             | N-Acetylneuraminic acid                             | 1.4734 | 1.473  | 1.2493 | 0.04673   | 0.1856  |
| neg_3095                                                            | Gamma-Glutamyltyrosine                              | 1.4062 | 1.406  | 0.7945 | 0.009307  | 0.07669 |
| neg_6254                                                            | 3b-Hydroxy-6b-methoxy-7(11)-eremophilin-12,8a-olide | 1.3024 | 1.3024 | 0.7853 | 0.04048   | 0.1721  |
| neg_9042                                                            | Beta-Hydroxypyruvic acid                            | 1.2473 | 1.2473 | 0.8255 | 0.01423   | 0.09635 |
| pos_3287                                                            | 4-Hydroxytetracine                                  | 1.1643 | 1.1572 | 0.8299 | 0.008418  | 0.1682  |

**Table S10.** The variable importance in the projection (VIP), Fold change (FC), *p*-value, and false discovery rate (FDR) value in metabolites abundance of UV-XJW48. The FC > 1.2 and *p* < 0.05 or FC < 0.83 and *p* < 0.05 were considered to indicate significantly upregulated and downregulated metabolites, respectively.

| Mode ID  | Metabolite                                                                                                                                                                    | VIP (OPLS-DA) | VIP (PLS-DA) | FC      | P_value   | FDR     |
|----------|-------------------------------------------------------------------------------------------------------------------------------------------------------------------------------|---------------|--------------|---------|-----------|---------|
| pos_2802 | (15a,20R)-Dihydroxypregn-4-en-3-one<br>20-[glucosyl-(1->4)-6-acetyl-glucoside]                                                                                                | 3.6716        | 3.5279       | 21.3557 | 0.005352  | 0.2663  |
| neg_6907 | 2- {[hydroxy(4-methoxy-1-benzofuran-<br>5-yl)methylidene]amino}acetic acid                                                                                                    | 3.1104        | 3.0205       | 0.1723  | 0.0002382 | 0.04135 |
| pos_7644 | PELLETIERINE                                                                                                                                                                  | 2.4514        | 2.3251       | 1.6155  | 0.013     | 0.3307  |
| neg_3278 | (6-carboxy-3,4,5-trihydroxyoxan-2-<br>yl)[2-(3,4-dihydroxyphenyl)-3,5,6-<br>trihydroxy-7H-chromen-7-<br>ylidene]oxidanium                                                     | 2.3936        | 2.3289       | 1.807   | 0.003042  | 0.05891 |
| pos_8602 | Imidazoleacetic acid riboside                                                                                                                                                 | 2.3273        | 2.235        | 1.5111  | 0.02101   | 0.3923  |
| neg_590  | 2- {2,6-dihydroxy-4-[6-hydroxy-7-(3-<br>methylbut-2-en-1-yl)-1-benzofuran-2-<br>yl]-3-methoxyphenyl}-6-(2,4-<br>dihydroxyphenyl)-4-methylcyclohex-3-<br>ene-1-carboxylic acid | 2.3185        | 2.256        | 1.5511  | 0.004635  | 0.07879 |
| pos_7036 | Isoleucylproline                                                                                                                                                              | 2.3134        | 2.2234       | 1.5342  | 0.009757  | 0.324   |
| neg_5348 | LysoPA(0:0/18:1(9Z))                                                                                                                                                          | 2.2489        | 2.1974       | 0.634   | 0.0009392 | 0.04135 |
| neg_7750 | Chlorogenoquinone                                                                                                                                                             | 2.2466        | 2.1858       | 1.5951  | 0.00026   | 0.04135 |
| neg_3893 | Butyl (S)-3-hydroxybutyrate glucoside                                                                                                                                         | 2.2317        | 2.1909       | 0.6178  | 0.003899  | 0.07025 |
| pos_7882 | Pyridine N-oxide glucuronide                                                                                                                                                  | 2.2049        | 2.067        | 1.5244  | 0.04261   | 0.4769  |



|          |                                                                                                                                                                                                                                                           |        |        |        |           |         |
|----------|-----------------------------------------------------------------------------------------------------------------------------------------------------------------------------------------------------------------------------------------------------------|--------|--------|--------|-----------|---------|
| neg_6891 | 5'-Deoxy-5-fluorouridine                                                                                                                                                                                                                                  | 2.1985 | 2.1462 | 0.6237 | 0.0005799 | 0.04135 |
| neg_7164 | Indolelactic acid                                                                                                                                                                                                                                         | 2.1137 | 2.0659 | 1.5156 | 0.01652   | 0.1766  |
| pos_6460 | 5-Hydroxysulfamethoxazole                                                                                                                                                                                                                                 | 2.09   | 2.0841 | 0.6927 | 0.04014   | 0.4699  |
| neg_397  | 3-Deoxy-D-glycero-D-galacto-2-nonulosonic acid                                                                                                                                                                                                            | 2.0476 | 1.9633 | 1.2891 | 0.01704   | 0.1807  |
| neg_4719 | PG(16:0/0:0)[U]                                                                                                                                                                                                                                           | 2.0304 | 1.9594 | 0.7336 | 0.004713  | 0.07972 |
| neg_3966 | 6-[(5-{{2,2-dimethyl-7-(2-methylbut-3-en-2-yl)-5-[(2-methylbut-3-en-2-yl)oxy]-8-oxo-2H,8H-pyrano[3,2-g]chromen-10-yl}oxy}-2-methyl-7,10-bis(2-methylbut-3-en-2-yl)-8-oxo-2H,8H-pyrano[3,2-g]chromen-2-yl)methoxy]-3,4,5-trihydroxyoxane-2-carboxylic acid | 1.9192 | 1.8693 | 1.3503 | 0.04513   | 0.2905  |
| neg_3047 | 3,4,5-trihydroxy-6-{{7-methoxy-3-(3-methoxyphenyl)-8-methyl-4-oxo-4H-chromen-5-yl}oxy}oxane-2-carboxylic acid                                                                                                                                             | 1.9023 | 1.8518 | 1.3571 | 0.006372  | 0.09795 |
| neg_391  | 1-Methylinosine                                                                                                                                                                                                                                           | 1.8743 | 1.8202 | 1.2712 | 0.02166   | 0.205   |
| pos_6648 | Coutaric acid                                                                                                                                                                                                                                             | 1.81   | 1.7104 | 1.2754 | 0.01777   | 0.3655  |
| neg_7617 | Gamma-Glutamylhistidine                                                                                                                                                                                                                                   | 1.7319 | 1.6848 | 1.3357 | 0.001513  | 0.04135 |
| neg_4782 | Gamma-Eudesmol rhamnoside                                                                                                                                                                                                                                 | 1.7118 | 1.6488 | 0.7539 | 0.008787  | 0.1192  |
| neg_7161 | 3-(4-hydroxyphenyl)-N-(4-oxobutyl)prop-2-enimidic acid                                                                                                                                                                                                    | 1.7054 | 1.6293 | 1.3338 | 0.04152   | 0.2811  |
| pos_6705 | Ornithine                                                                                                                                                                                                                                                 | 1.6428 | 1.5763 | 1.278  | 0.002615  | 0.2183  |
| neg_8407 | 4-Pyridoxic acid                                                                                                                                                                                                                                          | 1.5878 | 1.5292 | 1.2549 | 0.01837   | 0.1866  |

|          |                                                                               |        |        |        |            |         |
|----------|-------------------------------------------------------------------------------|--------|--------|--------|------------|---------|
| pos_3761 | Monotropein                                                                   | 1.5694 | 1.5133 | 0.8007 | 0.001354   | 0.2087  |
| pos_649  | (S)-ACPA<br>4-                                                                | 1.5651 | 1.5329 | 0.7876 | 0.04716    | 0.4903  |
| pos_6631 | AMINOETHYLBENZENESULFONY<br>L FLUORIDE                                        | 1.5563 | 1.4834 | 0.812  | 0.007252   | 0.2923  |
| pos_6766 | N1-(alpha-D-ribosyl)-5,6-dimethyl-<br>benzimidazole                           | 1.542  | 1.4781 | 1.2079 | 0.004191   | 0.242   |
| pos_7213 | 2-Ethylisonicotinamide                                                        | 1.5273 | 1.5217 | 1.2245 | 0.03968    | 0.4694  |
| pos_8202 | 5,7-dihydroxy-2-phenyl-8-(3,4,5-<br>trihydroxyoxan-2-yl)-4H-chromen-4-<br>one | 1.461  | 1.3906 | 1.2069 | 0.03167    | 0.4417  |
| neg_2014 | D-Erythrose 4-phosphate                                                       | 1.4297 | 1.3908 | 1.2051 | 0.00009565 | 0.03128 |

**Table S11.** The variable importance in the projection (VIP), Fold change (FC), *p*-value, and false discovery rate (FDR) value in metabolites abundance of GOUV-XJW48. The  $FC > 1.2$  and  $p < 0.05$  or  $FC < 0.83$  and  $p < 0.05$  were considered to indicate significantly upregulated and downregulated metabolites, respectively.

| Mode ID  | Metabolite                                                                                                                | VIP (OPLS-DA) | VIP (PLS-DA) | FC      | P_value   | FDR     |
|----------|---------------------------------------------------------------------------------------------------------------------------|---------------|--------------|---------|-----------|---------|
| pos_2802 | (15a,20R)-Dihydroxypregn-4-en-3-one<br>20-[glucosyl-(1->4)-6-acetyl-glucoside]                                            | 3.8559        | 3.8623       | 24.0626 | 0.01241   | 0.2062  |
| neg_6907 | 2-{{hydroxy(4-methoxy-1-benzofuran-<br>5-yl)methylidene}amino}acetic acid                                                 | 2.8417        | 2.8349       | 0.1562  | 0.0002326 | 0.02144 |
| neg_7660 | Seryltryptophan                                                                                                           | 2.7607        | 2.7526       | 0       | 0.02104   | 0.1253  |
| neg_3278 | (6-carboxy-3,4,5-trihydroxyoxan-2-<br>yl)[2-(3,4-dihydroxyphenyl)-3,5,6-<br>trihydroxy-7H-chromen-7-<br>ylidene]oxidanium | 2.6471        | 2.6395       | 2.2083  | 0.001571  | 0.05119 |
| pos_7644 | PELLETIERINE                                                                                                              | 2.587         | 2.5834       | 1.698   | 0.009678  | 0.1847  |
| pos_8898 | 1,3-Propanediamine                                                                                                        | 2.49          | 2.4963       | 1.7847  | 0.02261   | 0.2523  |
| pos_3664 | (S)-10,16-Dihydroxyhexadecanoic acid                                                                                      | 2.4352        | 2.4387       | 1.5628  | 0.01034   | 0.1908  |
| pos_3239 | 3R-aminononanoic acid                                                                                                     | 2.3559        | 2.3537       | 0.5963  | 0.0001762 | 0.08115 |
| pos_904  | Lumichrome                                                                                                                | 2.3369        | 2.3333       | 0.6369  | 0.02382   | 0.2588  |
| neg_179  | N-Acetylneuraminic acid                                                                                                   | 2.3177        | 2.3113       | 1.5886  | 0.001936  | 0.05417 |
| neg_1774 | L-Aspartic Acid                                                                                                           | 2.2842        | 2.2734       | 0.5661  | 0.03783   | 0.1698  |
| pos_6162 | 6-(Allylthio)purine                                                                                                       | 2.2025        | 2.2061       | 0.6887  | 0.01731   | 0.2332  |
| pos_3303 | Diacetone alcohol                                                                                                         | 2.1983        | 2.1948       | 1.4771  | 0.002189  | 0.1151  |
| pos_5791 | Tangeritin                                                                                                                | 2.1752        | 2.1745       | 0.7152  | 0.03038   | 0.2795  |
| pos_6248 | (+)-4,11-Eudesmadien-3-one                                                                                                | 2.1514        | 2.1526       | 1.4972  | 0.003268  | 0.1299  |

|          |                                                                      |        |        |        |           |         |
|----------|----------------------------------------------------------------------|--------|--------|--------|-----------|---------|
| pos_6460 | 5-Hydroxysulfamethoxazole                                            | 2.1487 | 2.145  | 0.6803 | 0.03725   | 0.3055  |
| pos_6623 | Cucurbitic acid                                                      | 2.0931 | 2.0828 | 1.4612 | 0.04263   | 0.3188  |
| neg_4371 | Corchorifatty acid A                                                 | 2.0836 | 2.0778 | 0.5952 | 0.004259  | 0.05656 |
| neg_3893 | Butyl (S)-3-hydroxybutyrate glucoside                                | 2.0731 | 2.0674 | 0.6006 | 0.00359   | 0.05656 |
| pos_6936 | 5-Hydroxy-L-tryptophan                                               | 2.0685 | 2.0663 | 0.6609 | 0.000629  | 0.08326 |
| pos_3542 | (1R*,2R*,4R*,8S*)-p-Menthane-1,2,8,9-tetrol 9-glucoside              | 2.0568 | 2.0558 | 0.707  | 0.001955  | 0.1145  |
| neg_6891 | 5'-Deoxy-5-fluorouridine                                             | 2.0396 | 2.0343 | 0.6059 | 0.000549  | 0.03565 |
| pos_6043 | MG(15:0/0:0/0:0)                                                     | 2.0253 | 2.0312 | 1.3774 | 0.02835   | 0.2795  |
| neg_394  | 1,4-beta-D-Glucan                                                    | 2.0112 | 2.007  | 1.5076 | 0.001085  | 0.04594 |
| pos_8602 | Imidazoleacetic acid riboside                                        | 1.9933 | 1.9871 | 1.38   | 0.01487   | 0.2207  |
| pos_5941 | 3-(Hydroxymethyl)-2-octanone                                         | 1.9597 | 1.9648 | 1.2876 | 0.02349   | 0.2566  |
| neg_7153 | 3,4,5-trihydroxy-6-(2-methyl-3-phenylpropoxy)oxane-2-carboxylic acid | 1.9166 | 1.9089 | 1.5306 | 0.02908   | 0.1479  |
| pos_3274 | Aloe emodin anthrone                                                 | 1.8592 | 1.857  | 1.3094 | 0.0008739 | 0.0858  |
| neg_397  | 3-Deoxy-D-glycero-D-galacto-2-nonulosonic acid                       | 1.8345 | 1.8319 | 1.2877 | 0.01553   | 0.1073  |
| neg_4372 | 13,14-dihydro-15(R)-Prostaglandin E1                                 | 1.8036 | 1.7989 | 0.7305 | 0.0003012 | 0.02489 |
| pos_5776 | 1alpha-hydroxyvitamin D3                                             | 1.7987 | 1.7983 | 0.7481 | 0.01916   | 0.2422  |
| pos_6705 | Ornithine                                                            | 1.7939 | 1.7854 | 1.3423 | 0.04052   | 0.3135  |
| pos_6631 | 4-AMINOETHYLBENZENESULFONYL FLUORIDE                                 | 1.7786 | 1.7793 | 0.7499 | 0.003498  | 0.1303  |
| neg_6983 | 5-Phenyl-1,3-oxazinane-2,4-dione                                     | 1.7755 | 1.7748 | 0.7844 | 0.02677   | 0.1419  |
| neg_391  | 1-Methylinosine                                                      | 1.7507 | 1.7468 | 1.2874 | 0.0004456 | 0.03161 |
| pos_3393 | 6-{[3-(2,4-                                                          | 1.7493 | 1.7459 | 0.8065 | 0.04609   | 0.3309  |

|          |                                                                                                                                                 |        |        |        |            |         |
|----------|-------------------------------------------------------------------------------------------------------------------------------------------------|--------|--------|--------|------------|---------|
| pos_8202 | dihydroxyphenyl)propanoyl]oxy}-3,4,5-trihydroxyoxane-2-carboxylic acid<br>5,7-dihydroxy-2-phenyl-8-(3,4,5-trihydroxyoxan-2-yl)-4H-chromen-4-one | 1.743  | 1.7435 | 1.2878 | 0.007444   | 0.1693  |
| neg_7136 | 6- {[1,3-dihydroxy-1-(1-oxo-1H-isochromen-3-yl)butan-2-yl]oxy}-3,4,5-trihydroxyoxane-2-carboxylic acid                                          | 1.7194 | 1.7127 | 1.3891 | 0.02511    | 0.1375  |
| neg_7629 | Gamma-Glutamylphenylalanine                                                                                                                     | 1.7011 | 1.6965 | 0.6772 | 0.002209   | 0.05656 |
| pos_7798 | Glutamylphenylalanine                                                                                                                           | 1.7002 | 1.701  | 1.3537 | 0.003015   | 0.1281  |
| neg_6048 | (-)-Arctigenin                                                                                                                                  | 1.6634 | 1.6601 | 1.3211 | 0.001592   | 0.0513  |
| pos_3448 | 5-(3,4,5-trihydroxyphenyl)pentanoic acid                                                                                                        | 1.6601 | 1.6549 | 1.2299 | 0.01529    | 0.224   |
| neg_1109 | 11(S)-HEPE                                                                                                                                      | 1.6531 | 1.6521 | 0.7865 | 0.03873    | 0.1719  |
| neg_2875 | Tyrosyl-Proline                                                                                                                                 | 1.6265 | 1.62   | 0.734  | 0.03794    | 0.1701  |
| pos_3761 | Monotropein                                                                                                                                     | 1.6223 | 1.6201 | 0.7859 | 0.001112   | 0.08787 |
| neg_4782 | Gamma-Eudesmol rhamnoside                                                                                                                       | 1.6204 | 1.6171 | 0.7297 | 0.006991   | 0.07117 |
| pos_7590 | Pantothenol                                                                                                                                     | 1.6109 | 1.6095 | 1.3122 | 0.02726    | 0.2751  |
| neg_4318 | MG(0:0/18:3(6Z,9Z,12Z)/0:0)                                                                                                                     | 1.5983 | 1.5969 | 0.763  | 0.02223    | 0.1289  |
| pos_7395 | 4-Methylene-L-glutamine                                                                                                                         | 1.5961 | 1.591  | 1.2198 | 0.01738    | 0.2332  |
| pos_5977 | Monic acid                                                                                                                                      | 1.5655 | 1.5625 | 0.8154 | 0.02607    | 0.2687  |
| neg_8440 | Xanthopterin                                                                                                                                    | 1.5624 | 1.5575 | 0.6887 | 0.04114    | 0.1764  |
| neg_2257 | S-Prenyl-L-cysteine                                                                                                                             | 1.5573 | 1.5535 | 1.2855 | 0.00002422 | 0.01207 |
| neg_590  | 2-{2,6-dihydroxy-4-[6-hydroxy-7-(3-methylbut-2-en-1-yl)-1-benzofuran-2-yl]-3-methoxyphenyl}-6-(2,4-                                             | 1.5472 | 1.5427 | 1.3005 | 0.002432   | 0.05656 |

---

|          |                                                                   |        |        |        |         |        |
|----------|-------------------------------------------------------------------|--------|--------|--------|---------|--------|
|          | dihydroxyphenyl)-4-methylcyclohex-3-ene-1-carboxylic acid         |        |        |        |         |        |
| neg_4388 | Myristoleic acid                                                  | 1.5288 | 1.5296 | 0.7892 | 0.04938 | 0.1945 |
| neg_9003 | A-L-Arabinofuranosyl-(1->2)-[a-D-mannopyranosyl-(1->6)]-D-mannose | 1.5277 | 1.5245 | 0.7584 | 0.01979 | 0.1219 |
| pos_7601 | 5-Pyridoxolactone                                                 | 1.5218 | 1.5188 | 1.2144 | 0.03494 | 0.2972 |
| neg_6046 | PE(15:1/0:0)                                                      | 1.4584 | 1.4511 | 0.8184 | 0.04695 | 0.1892 |
| neg_7617 | Gamma-Glutamylhistidine                                           | 1.409  | 1.4077 | 1.277  | 0.01702 | 0.1127 |
| neg_9122 | ADP-ribose                                                        | 1.3729 | 1.3711 | 0.7734 | 0.02838 | 0.1461 |
| neg_6254 | 3b-Hydroxy-6b-methoxy-7(11)-eremophilen-12,8a-olide               | 1.2868 | 1.2827 | 0.7905 | 0.04251 | 0.1782 |

---
